# Supplementary material for: Synthesis and Structural Evaluation of Organo-Ruthenium Complexes with β-Diketonates
Source: PubMed Central journal article supplement (PMC6155601; doi:10.3390/molecules22020326), 2017-02-20
Supplement: molecules-22-00326-s001.pdf [file molecules-22-00326-s001.pdf]

## Supplementary information

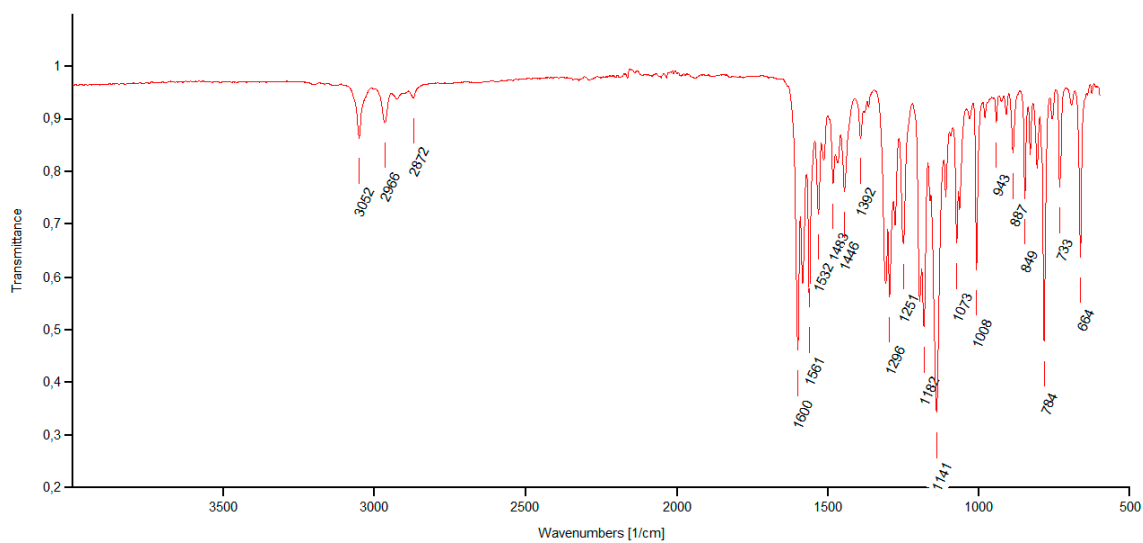

**Figure 1.** IR spectrum of  $[(\eta^6\text{-}p\text{-cymene})\text{Ru}(4,4,4\text{-trifluoro-1-(4-bromophenyl)-1,3-butanedione})\text{Cl}]$ , **1**.

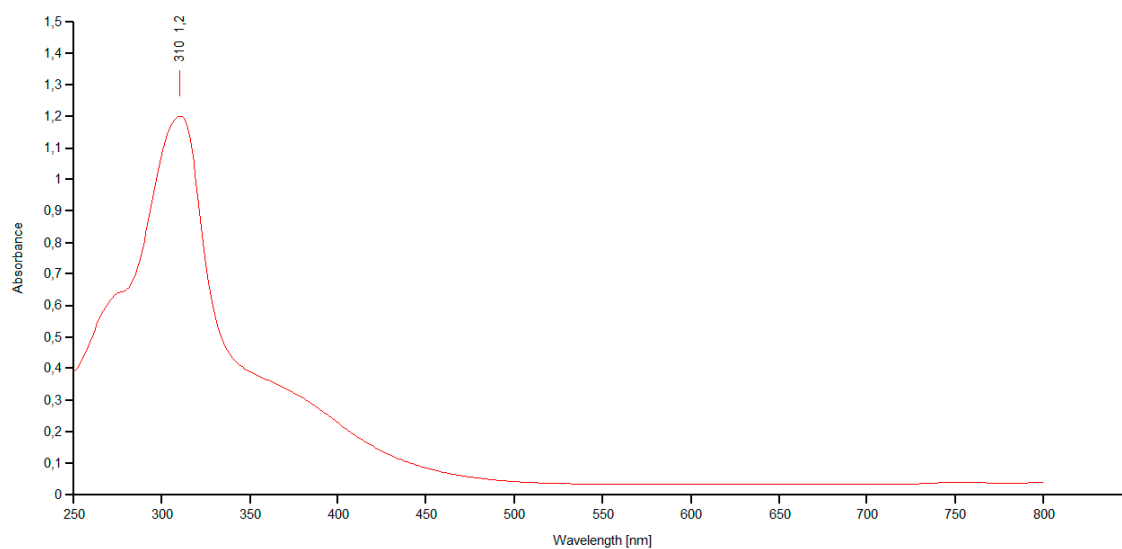

**Figure 2.** UV-Vis spectrum of  $[(\eta^6\text{-}p\text{-cymene})\text{Ru}(4,4,4\text{-trifluoro-1-(4-bromophenyl)-1,3-butanedione})\text{Cl}]$ , **1**.

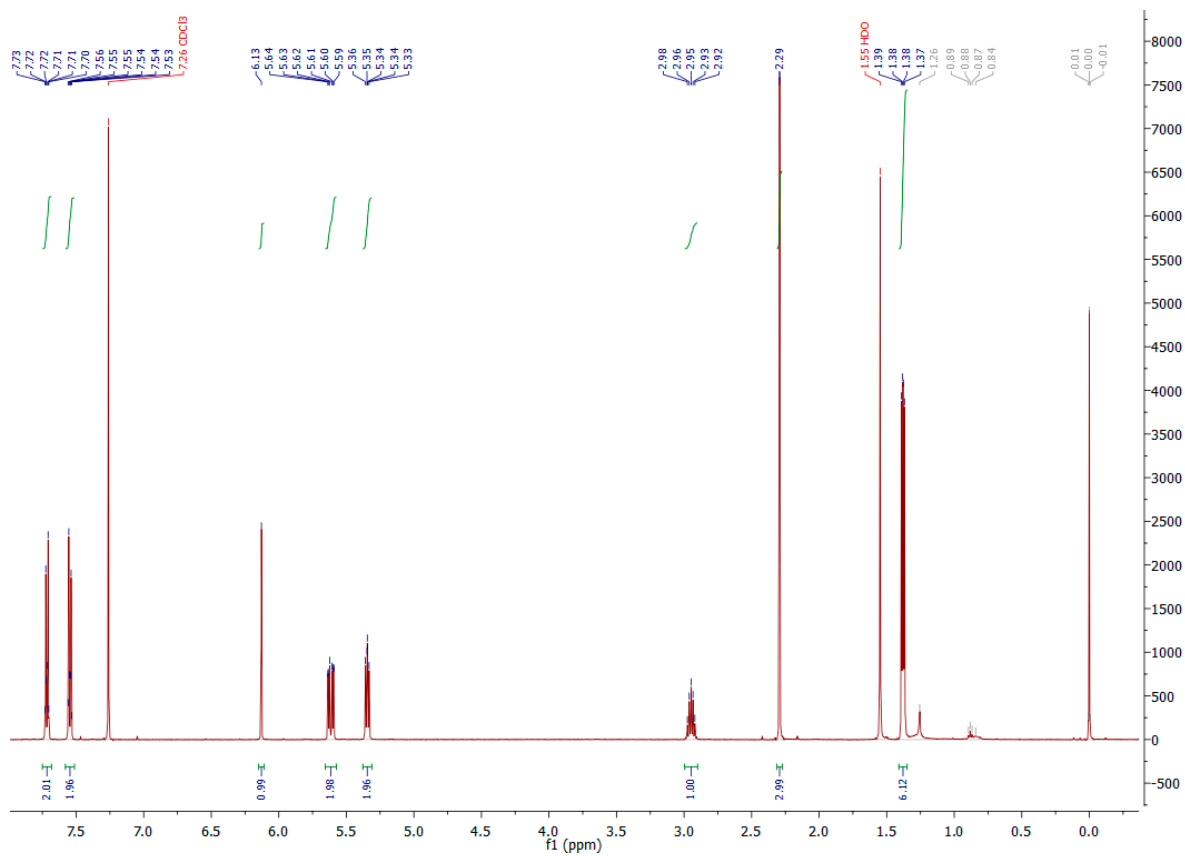

**Figure 3.** NMR spectrum of  $[(\eta^6\text{-}p\text{-cymene})\text{Ru}(4,4,4\text{-trifluoro-1-(4-bromophenyl)-1,3-butanedione})\text{Cl}]$ , **1**.

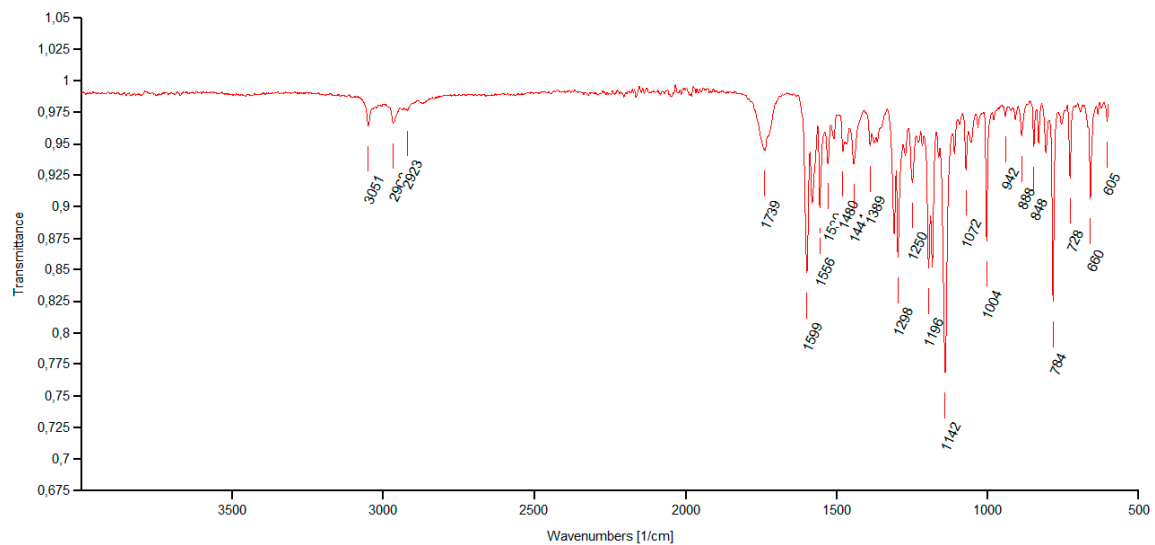

**Figure 4.** IR spectrum of  $[(\eta^6\text{-}p\text{-cymene})\text{Ru}(4,4,4\text{-trifluoro-1-(4-iodophenyl)-1,3-butanedione})\text{Cl}]$ , **3**.

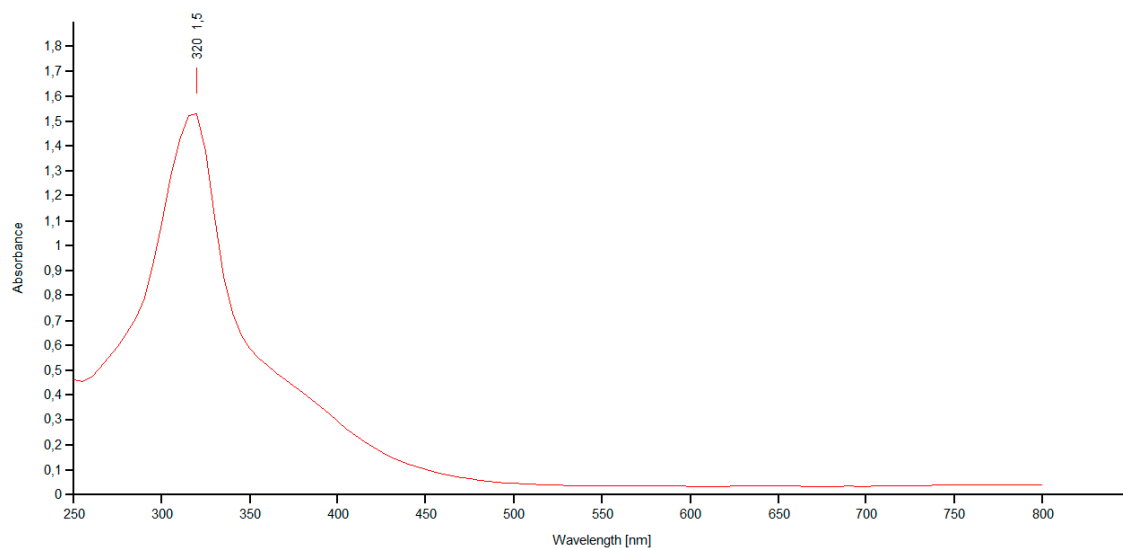

**Figure 5.** UV-Vis spectrum of  $[(\eta^6\text{-}p\text{-cymene})\text{Ru}(4,4,4\text{-trifluoro-1-(4-iodophenyl)-1,3-butanedione})\text{Cl}]$ , **3**.

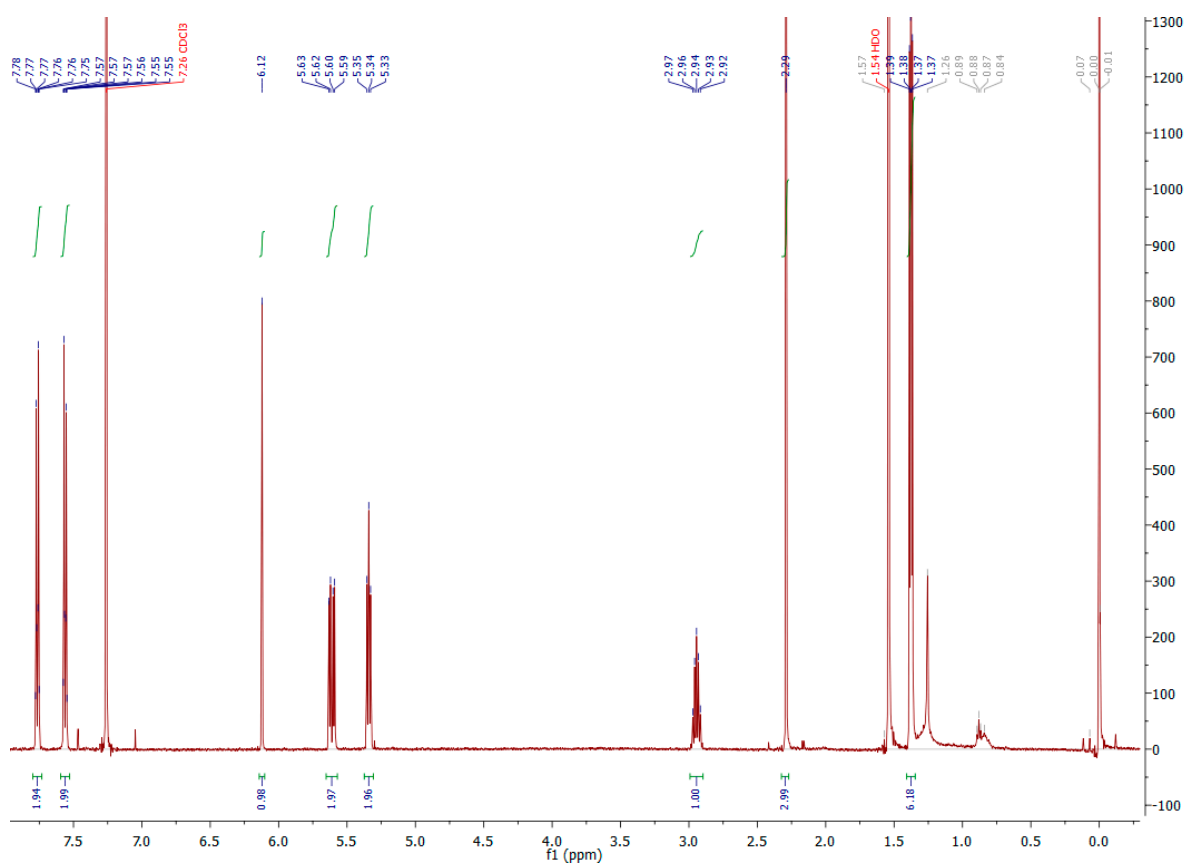

**Figure 6.** NMR spectrum of  $[(\eta^6\text{-}p\text{-cymene})\text{Ru}(4,4,4\text{-trifluoro-1-(4-iodophenyl)-1,3-butanedione})\text{Cl}]$ , **3**.

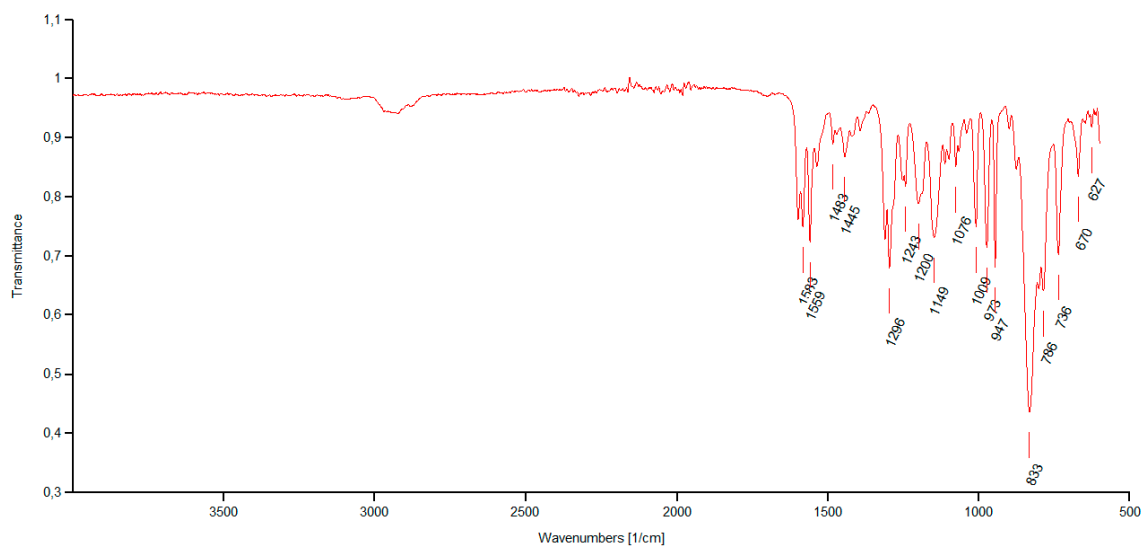

**Figure 7.** IR spectrum of  $[(\eta^6\text{-}p\text{-cymene})\text{Ru}(4,4,4\text{-trifluoro-1-(4-bromophenyl)-1,3-butanedione})\text{pta}]\text{PF}_6$ , **2**.

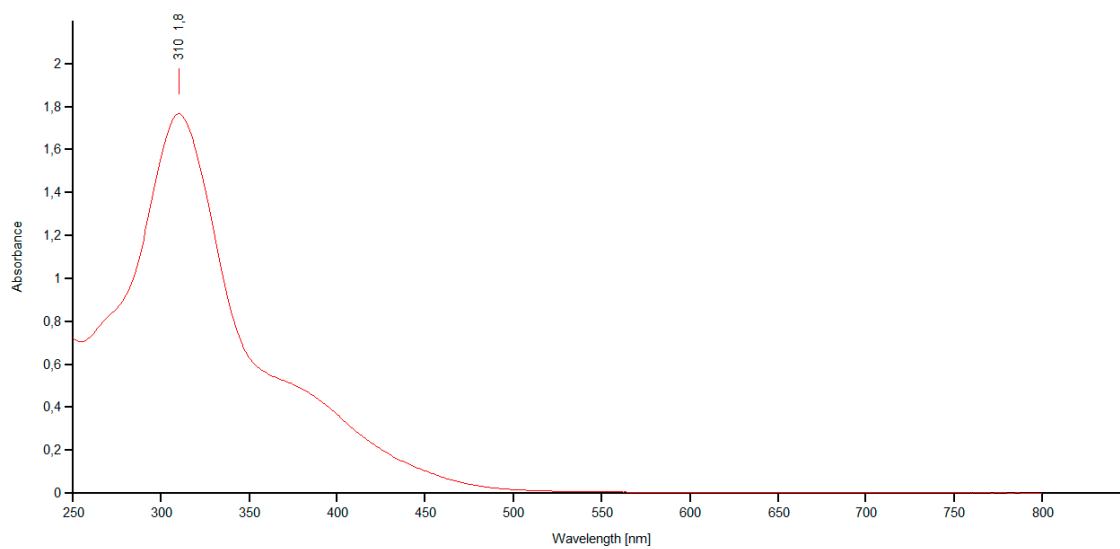

**Figure 8.** UV-Vis spectrum of  $[(\eta^6\text{-}p\text{-cymene})\text{Ru}(4,4,4\text{-trifluoro-1-(4-bromophenyl)-1,3-butanedione})\text{pta}]\text{PF}_6$ , **2**.

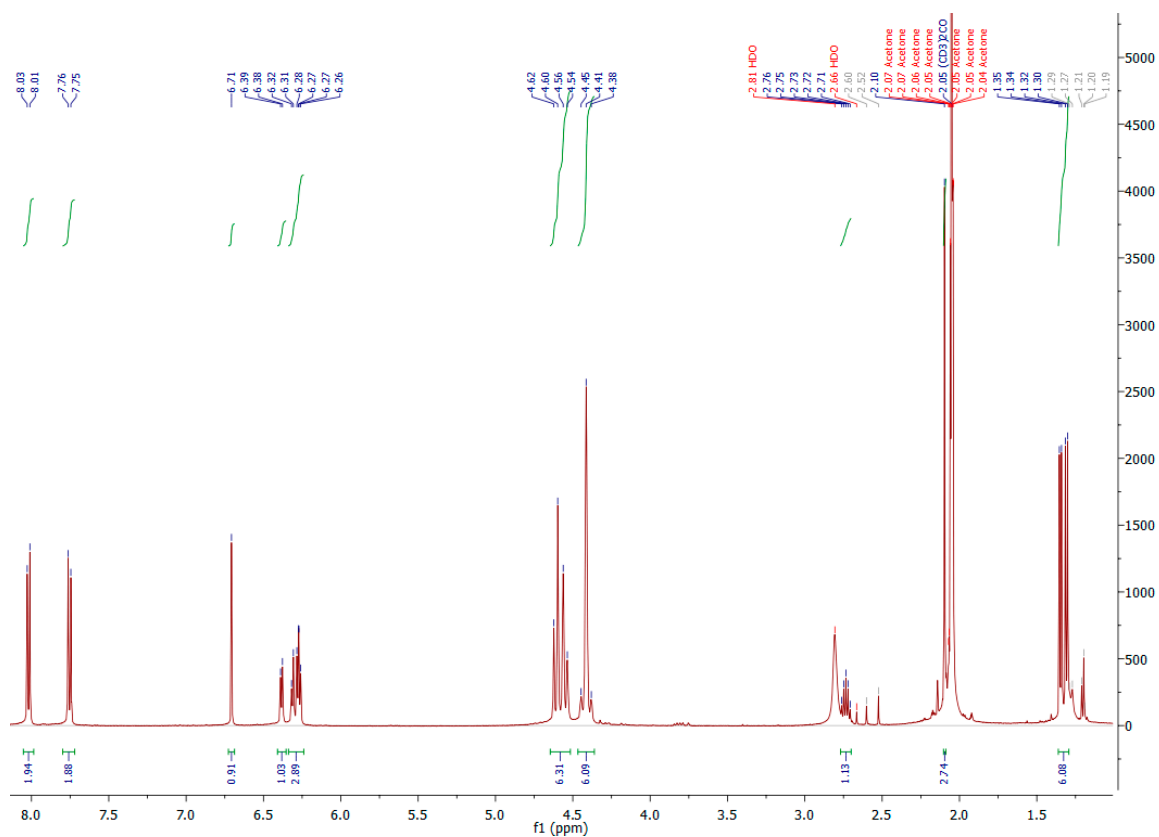

**Figure 9.** NMR spectrum of  $[(\eta^6\text{-}p\text{-cymene})\text{Ru}(4,4,4\text{-trifluoro-1-(4-bromophenyl)-1,3-butanedione})\text{pta}]\text{PF}_6$ , **2**.

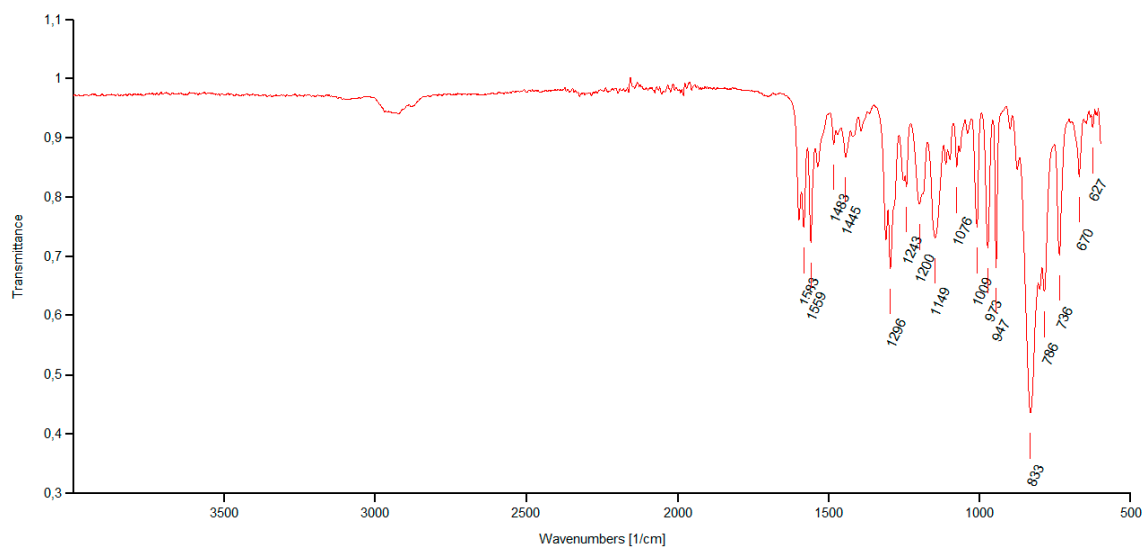

**Figure 10.** IR spectrum of  $[(\eta^6\text{-}p\text{-cymene})\text{Ru}(4,4,4\text{-trifluoro-1-(4-iodophenyl)-1,3-butanedione})\text{pta}]\text{PF}_6$ , **4**.

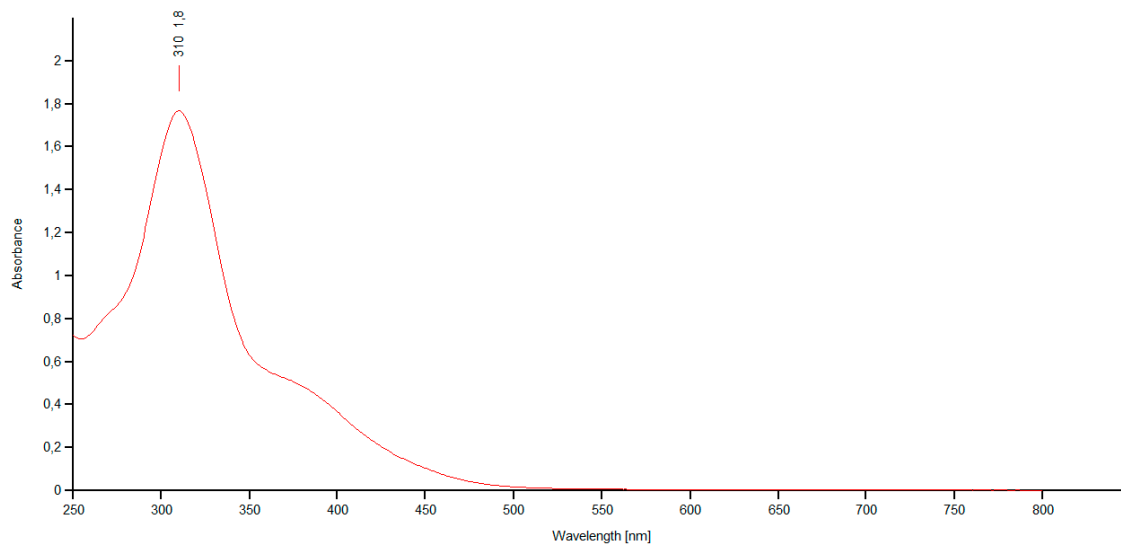

**Figure 11.** UV-Vis spectrum of  $[(\eta^6\text{-}p\text{-cymene})\text{Ru}(4,4,4\text{-trifluoro-1-(4-iodophenyl)-1,3-butanedione})\text{pta}]\text{PF}_6$ , **4**.

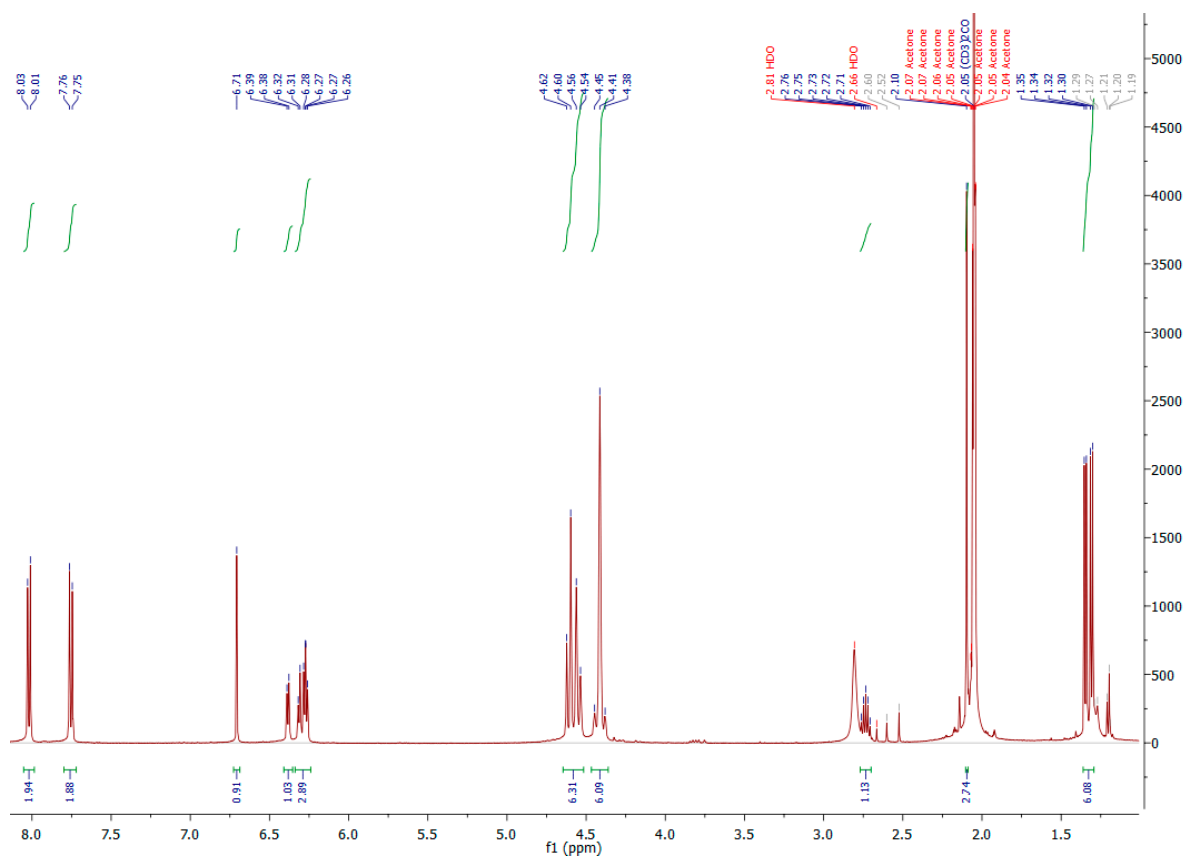

**Figure 12.** IR spectrum of  $[(\eta^6\text{-}p\text{-cymene})\text{Ru}(4,4,4\text{-trifluoro-1-(4-iodophenyl)-1,3-butanedione})\text{pta}]\text{PF}_6$ , **4**.

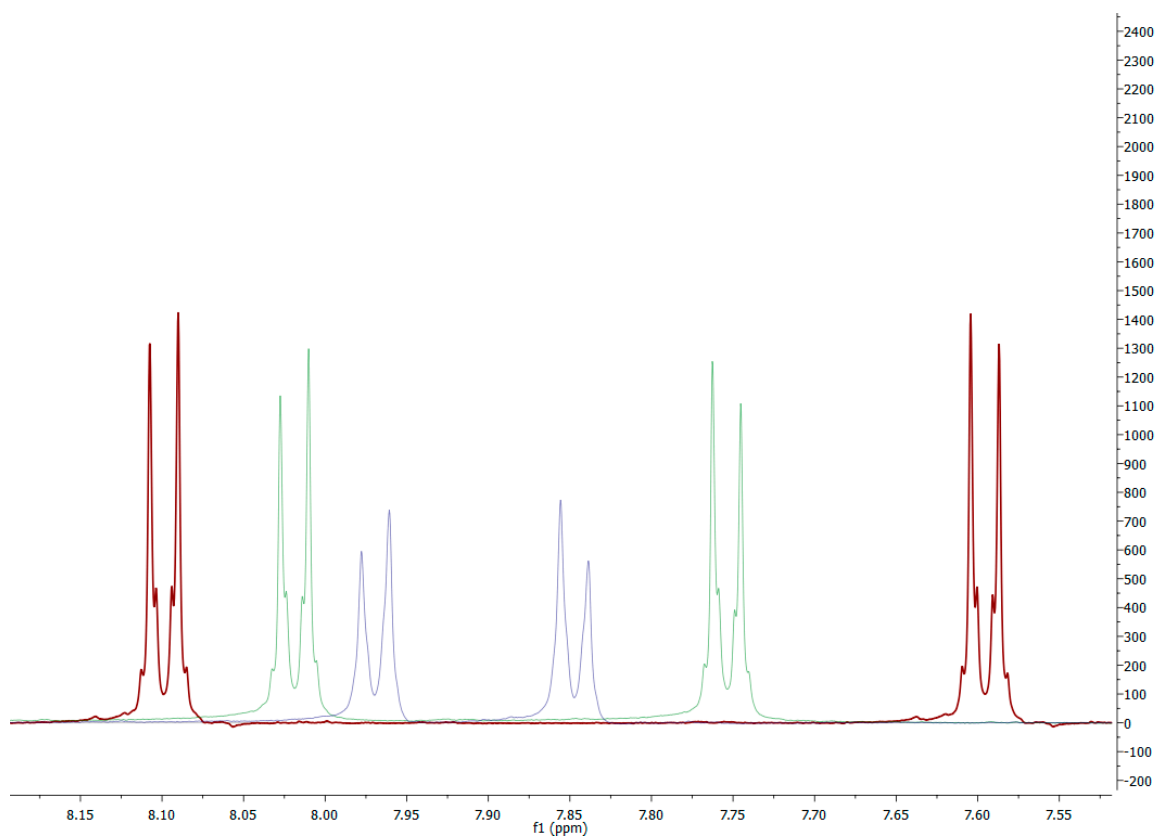

**Figure 13.**  $^1\text{H}$ -NMR shifts of the hydrogen atoms on the phenyl ring of the ligand for complexes **2** (green), **4** (blue) and **6** (red).

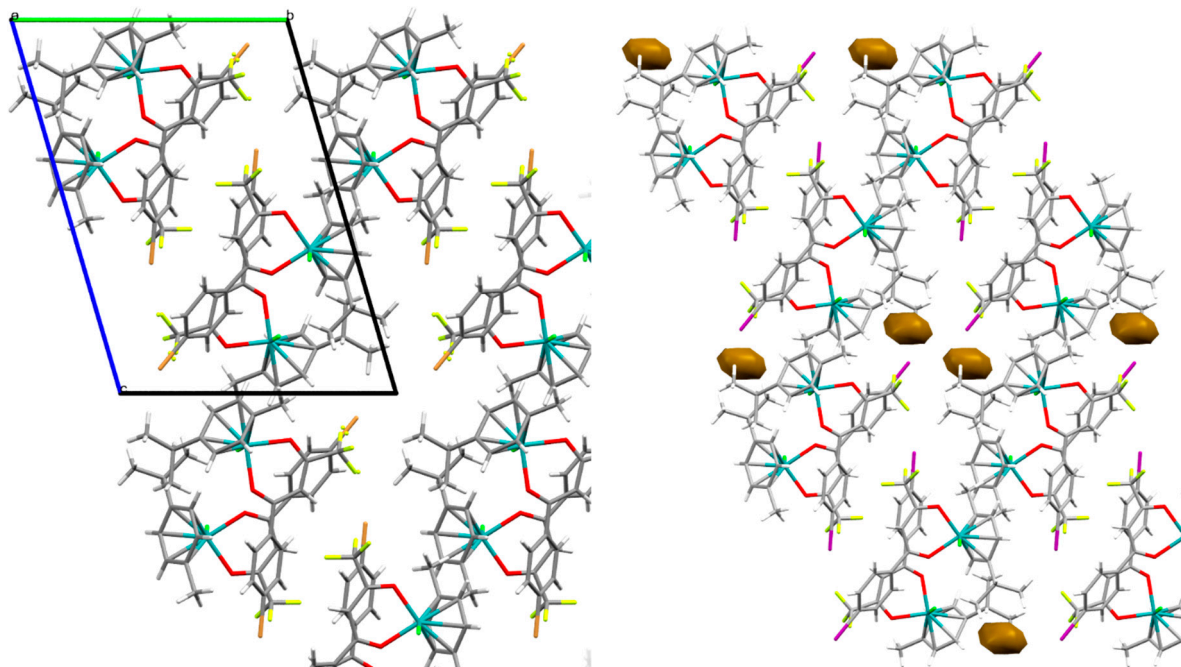

**Figure 14.** Packing of **1** (left) and **3** (right). Voids are indicated by ochre clouds.

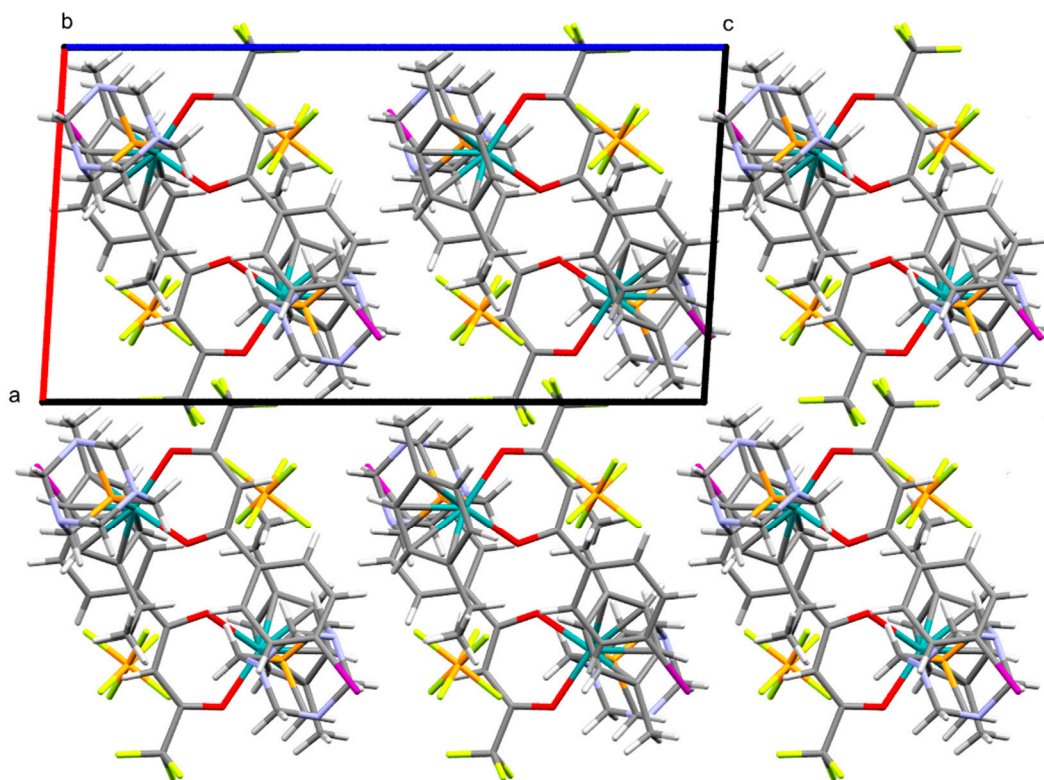

**Figure 15.** Packing of **4**. Note that the protruding  $-\text{CF}_3$  groups are not in the same plane and do not interact with any atoms.



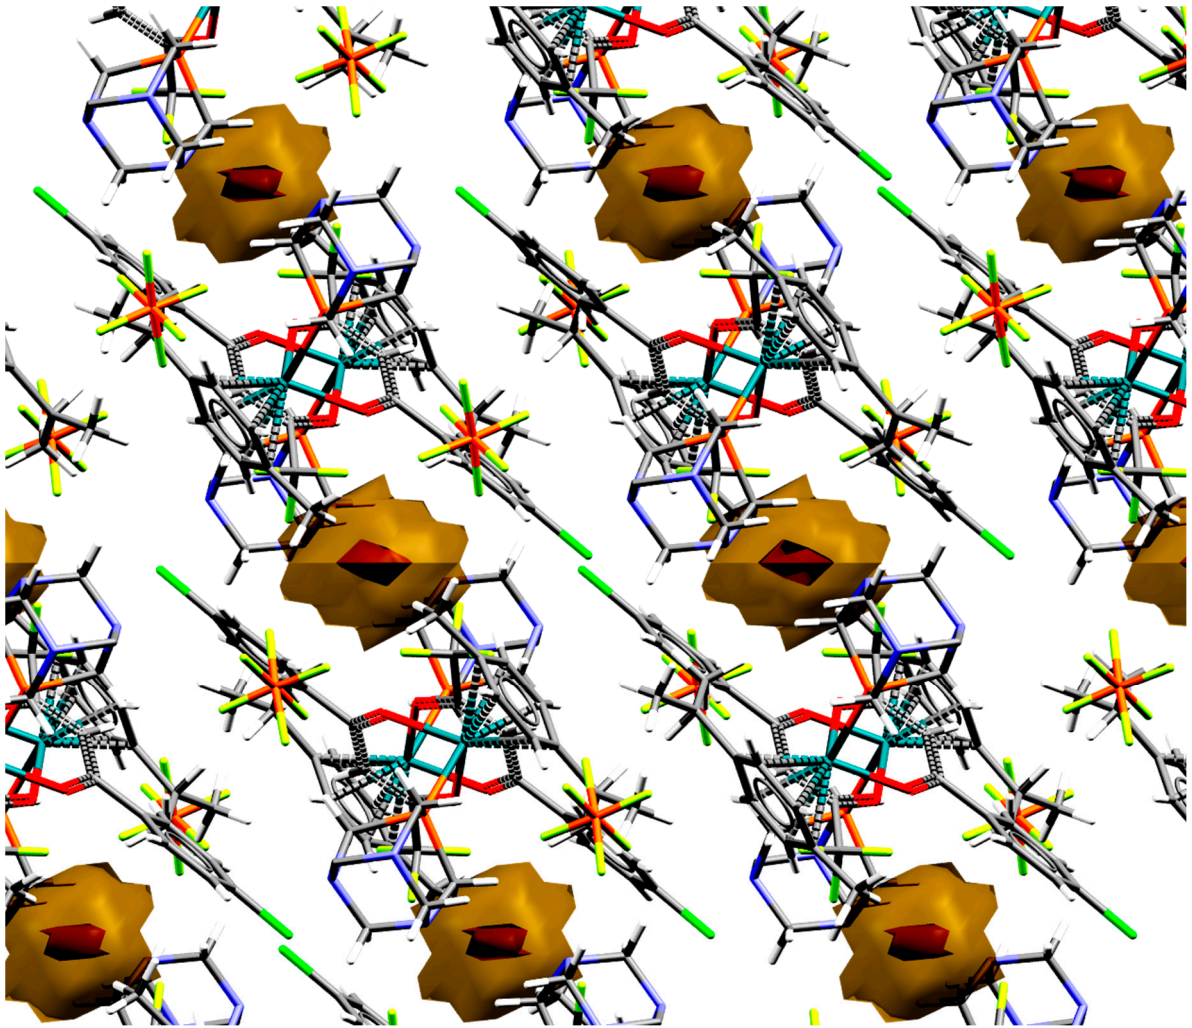

**Figure 16.** Packing of 6 along b axis. Solvent inaccessible voids are indicated with ochre clouds, solvent accessible voids are indicated with red clouds.
